# Supplementary material
Source: publisher site journal article supplement (https://www.degruyterbrill.com/publication/isbn/9783110912067/downloadAsset/9783110912067_Inhaltsverzeichnis.pdf)
Supplement: Supplementary file 1 [file 9783110912067_Inhaltsverzeichnis.pdf]

## Inhaltsverzeichnis

| Nr. |                                                                                                                                       | Seite |
|-----|---------------------------------------------------------------------------------------------------------------------------------------|-------|
| 1   | Verlängerung der Abschiebungshaft gegen einen Ausländer im sog. Kirchenasyl. BayObLG, Beschluss vom 8.1.2001 (3Z BR 358/00).....      | 1     |
| 2   | Keine Vorlagepflicht für Kirchensteuerbeschluss. BVerwG, Beschluss vom 11.1.2001 (11 B 64/00) .....                                   | 2     |
| 3   | Unerlaubte Rechtsberatung. OLG München, Urteil vom 25.1.2001 (6 U 4759/00).....                                                       | 5     |
| 4   | Kirchensteuer auf Abfindungszahlung nach Kirchenaustritt. FG München, Urteil vom 26.1.2001 (13 K 2292/00).....                        | 11    |
| 5   | Lehrerin an einer katholischen Schule, Loyalitätsobliegenheiten. BVerfG, Beschluss vom 31.1.2001 (1 BvR 619/92) .....                 | 13    |
| 6   | Kündigung während des Laufs der Frist nach § 31 Abs. 2 MAVO. LAG Köln, Urteil vom 2.2.2001 (11 Sa 1292/00).....                       | 16    |
| 7   | Inanspruchnahme einer sog. Altfallregelung nach Aufenthalt im Kirchenasyl. VG des Saarlandes, Beschluss vom 5.2.2001 (6 F 86/00)..... | 18    |
| 8   | Unterlassungsanspruch eines kath. Bistums. LG Berlin, Urteil vom 8.2.2001 (27 O 7/01).....                                            | 21    |
| 9   | Rechtsweg in kirchendienstl. Statussachen. VGH Baden-Württemberg, Beschluss vom 12.2.2001 (4 S 1448/00) .....                         | 24    |
| 10  | Abkopplung des kirchl. Besoldungsrechts vom öffentl. Dienst des Landes. VG Göttingen, Urteil vom 13.2.2001 (3 A 3138/99) .....        | 30    |
| 11  | Geschlechtsspezifische Stellenausschreibung durch kath. Frauenverband. ArbG München, Urteil vom 14.2.2001 (38 Ca 8663/00).....        | 35    |
| 12  | Kopftuchverbot für Grundschullehrerin. EGMR, Nichtzulassungsbeschluss vom 15.2.2001 (Appl.No. 42393/98 [Dhalab ./ Schweiz]) .....     | 38    |
| 13  | Mündliche Kirchenaustrittserklärung in der DDR. VG Magdeburg, Gerichtsbescheid vom 20.2.2001 (A 6 K 559/99) .....                     | 53    |
| 14  | Kündigung eines Kirchenmusikers durch ev. Kirchengemeinde. BAG, Urteil vom 21.2.2001 (2 AZR 579/99) .....                             | 55    |
| 15  | Loyalitätspflicht einer Kindergärtnerin im kirchl. Dienst. BAG, Urteil vom 21.2.2001 (2 AZR 139/00).....                              | 63    |

|    |                                                                                                                                                                    |     |
|----|--------------------------------------------------------------------------------------------------------------------------------------------------------------------|-----|
| 16 | Verletzung staatl. Schutzpflichten aus Art. 4 Abs. 1 u. 2 GG ggü. Religionsgemeinschaft. BVerfG, Beschluss vom 26.3.2001 (2 BvR 943/99).....                       | 79  |
| 17 | Nachrichtendienstliche Beobachtung von Scientology. VG des Saarlandes, Urteil vom 29.3.2001 (6 K 149/00) .....                                                     | 82  |
| 18 | Religiöse Kriterien bei Sorgerechtsregelung nach Trennung der Eltern. OLG Nürnberg, Beschluss vom 30.3.2001 (7 UF 2844/00) .....                                   | 108 |
| 19 | Gebührenermäßigung für mit der kath. Kirche verbundenen Orden. OLG Hamm, Beschluss vom 10.4.2001 (15 W 416/99).....                                                | 113 |
| 20 | Subventionsleistung für kirchl. Träger und Haushaltsvorbehalt. VGH Baden-Württemberg, Urteil vom 10.4.2001 (1 S 245/00) .....                                      | 116 |
| 21 | Aufnahme eines Behinderten in eine diakonische Einrichtung der Behindertenhilfe, Umfang des Wunschrechts. VG Halle (Saale), Urteil vom 26.4.2001 (4 A 270/99)..... | 125 |
| 22 | Anerkennung der Zeugen Jehovas als Körperschaft des öffentl. Rechts, Aufklärungsbedarf. BVerwG, Urteil vom 17.5.2001 (7 C 1/01) .....                              | 130 |
| 23 | Pfarrpfündestiftung, Nachweis der gesetzlichen Vertretung. BayObLG, Beschluss vom 22.5.2001 (2Z BR 49/01).....                                                     | 137 |
| 24 | Testamenauslegung. BayObLG, Beschluss vom 23.5.2001 (1 Z BR 10/01).....                                                                                            | 141 |
| 25 | Gebührenfreiheit für kirchliche Stiftung. VGH Baden-Württemberg, Urteil vom 23.5.2001 (3 S 815/00) .....                                                           | 146 |
| 26 | Hinweis in der Lohnsteuerkarte auf Nichtzugehörigkeit zu einer steuererhebenden Religionsgemeinschaft. BVerfG, Beschluss vom 25.5.2001 (1 BvR 2253/00) .....       | 157 |
| 27 | Versetzung eines ev. Pfarrers in den Ruhestand, Rechtsweg. OVG Rheinland-Pfalz, Urteil vom 1.6.2001 (2 A 12125/00).....                                            | 159 |
| 28 | Rechtsberatung durch freie Wohlfahrtsverbände. LG Stuttgart Urteil vom 21.6.2001 (5 KfH O 21/01).....                                                              | 169 |
| 29 | Kündigung einer muslimischen Verkäuferin wegen Tragens eines Kopftuches. LAG Frankfurt a.M., Urteil vom 21.6.2001 (3 Sa 1448/ 00).....                             | 174 |
| 30 | Fortdauer der Exemption gemäß § 118 Abs. 2 BetrVG nach Ausgliederung einer karitativen Einrichtung. LAG Hamm, Beschluss vom 22.6.2001 (10 TaBV 96/00).....         | 182 |
| 31 | Kopftuchverbot für muslimische Lehrerin im öffentl. Schuldienst. VGH Baden-Württemberg, Urteil vom 26.6.2001 (4 S 1439/00) .....                                   | 192 |

|    |                                                                                                                                                                                                                |     |
|----|----------------------------------------------------------------------------------------------------------------------------------------------------------------------------------------------------------------|-----|
| 32 | Genehmigung für Anlage einer Kapelle u. eines Friedhofs. EGMR, Entscheidung vom 10.7.2001 (Appl.No. 41754/98 [Johannische Kirche u.a. ./ Deutschland]) .....                                                   | 212 |
| 33 | Klagebefugnis eines Vereins bei Einreiseverweigerung für sein ausländisches geistliches Oberhaupt. BVerwG, Urteil vom 10.7.2001 (1 C 35/00) .....                                                              | 217 |
| 34 | Geltungsbereich des staatlichen kollektiven Arbeitsrechts. ArbG Mönchengladbach, Beschluss vom 12.7.2001 (4 BV 34/01) .....                                                                                    | 223 |
| 35 | Abgrenzung von Tatsachenbehauptung und zulässiger Meinungsäußerung bei behaupteter „Zusammenarbeit“ des Logistikkonzerns „UPS“ mit der „Scientology Sekte“. KG Berlin, Urteil vom 17.7.2001 (14 U 60/01) ..... | 231 |
| 36 | Kirchgeld in Ev.-luth. Landeskirche Braunschweig. VG Braunschweig, Urteil vom 17.7.2001 (6 A 40/01) .....                                                                                                      | 240 |
| 37 | Rechtsweg für Abwehransprüche gegen die Äußerungen eines kirchl. Sektenebeauftragten. BGH, Beschluss vom 24.7.2001 (VI ZB 12/00) .....                                                                         | 245 |
| 38 | Subsidiarität staatlichen Rechtsschutzes im kirchl. Amtsrecht. OVG Nordrhein-Westfalen, Beschluss vom 25.7.2001 (5 A 1516/00) .....                                                                            | 250 |
| 39 | Geltungsbereich des kirchlichen Arbeitsrechts. BAG, Urteil vom 26.7.2001 (6 AZR 138/00) .....                                                                                                                  | 252 |
| 40 | Insolvenzunfähigkeit von Kirchen. AG Potsdam, Beschluss vom 1.8.2001 (35 IN 538/01) .....                                                                                                                      | 260 |
| 41 | Betreuerbestellung für eine Bluttransfusion ablehnende Angehörige der Glaubensgemeinschaft der Zeugen Jehovas. BVerfG, Nichtannahmebeschluss vom 2.8.2001 (1 BvR 618/93) .....                                 | 261 |
| 42 | Kirchensteuerfestsetzung bei Zuzug aus dem Ausland. OVG Rheinland-Pfalz, Urteil vom 8.8.2001 (6 A 10237/01) .....                                                                                              | 265 |
| 43 | Kritik an Presseartikel über innerkirchliche Streitigkeit. LG Darmstadt, Urteil vom 14.8.2001 (13 O 324/99) .....                                                                                              | 269 |
| 44 | Bauvorbescheid zur Errichtung einer Moschee. VG Frankfurt a.M., Urteil vom 27.8.2001 (3 E 815/01[2]) .....                                                                                                     | 272 |
| 45 | Zur Förderung einer Weltanschauungsgemeinschaft aus Haushaltsmitteln. OVG Berlin, Urteil vom 11.9.2001 (8 B 3.00) .....                                                                                        | 286 |
| 46 | Zusatzversorgung nach Ausscheiden aus kirchl. Zusatzversorgungssystem. BAG, Urteil vom 18.9.2001 (AZR 689/00) .....                                                                                            | 294 |

|    |                                                                                                                                                               |     |
|----|---------------------------------------------------------------------------------------------------------------------------------------------------------------|-----|
| 47 | Private Arbeitsvermittlung durch ein Mitglied von Scientology. LSG Rheinland-Pfalz, Urteil vom 20.9.2001 (L 1 AL 49/01) .....                                 | 299 |
| 48 | Kirchenbeitrag als steuerliche Sonderausgabe. BFH, Urteil vom 10.10.2001 (XI R 52/00) .....                                                                   | 308 |
| 49 | Krankenversicherungsbeitrag auf Zusatzrente der Caritas-Schwes-ternschaft. BSG, Urteil vom 11.10.2001 (B 12 KR 4/00 R).....                                   | 312 |
| 50 | Geltungsbereich des BetrVG, kath. Wohnungsbau- und Siedlungs-gesellschaft. LAG Berlin, Urteil vom 12.10.2001 (TaBV 1359/01).....                              | 319 |
| 51 | Außerordentliche Änderungskündigung gegenüber einem Arbeitneh-mer einer diakonischen Einrichtung. BAG, Urteil vom 25.10.2001 (2 AZR 216/00) .....             | 323 |
| 52 | Islamischer Religionsunterricht in Berlin. VG Berlin, Urteil vom 25.10.2001 (27 A 254/01) .....                                                               | 328 |
| 53 | Strafbarkeit eines kath. Pfarrers wegen der Gewährung von sog. Kirchenasyl. LG Osnabrück, Urteil vom 2.11.2001 (7 Ns 131/01).....                             | 336 |
| 54 | Kirchenaustritt in der ehem. DDR. VG Berlin, Urteil vom 2.11.2001 (VG 10 A 377.00).....                                                                       | 343 |
| 55 | Islamischer Religionsunterricht in Nordrhein-Westfalen. VG Düssel-dorf, Urteil vom 2.11.2001 (1 K 10519/98).....                                              | 345 |
| 56 | Anpassung der Kirchensteuerfestsetzung bei Änderung des zugrunde liegenden Einkommensteuerbescheids. VG Darmstadt, Beschluss vom 5.11.2001 (4 G 783/01) ..... | 368 |
| 57 | Absenkung der Vergütung auf der Grundlage der AVR. BAG, Urteil vom 15.11.2001 (6 AZR 88/01).....                                                              | 374 |
| 58 | Aufwendungen einer Religionslehrerin für eine Israelreise als Wer-bungskosten. FG Münster, Urteil vom 15.11.2001 (14 K 1492/01 E).....                        | 382 |
| 59 | Ersatzweise Anwendung deutschen Ehescheidungsrechts aufgrund ordre public. OLG Zweibrücken, Urteil vom 16.11.2001 (2 UF 80/00) ..                             | 384 |
| 60 | Anerkennung eines Vereins als jüdische Kultusgemeinde / Körper-schaft des öffentl. Rechts. VG Halle (Saale), Urteil vom 22.11.2001 (3 A 1794/97).....         | 390 |
| 61 | Geschäftsmäßige Vertretung von Hilfesuchenden durch kirchl. Einrichtung. OVG Nordrhein-Westfalen, Beschluss vom 29.11.2001 (12 A 100/99) .....                | 401 |

|    |                                                                                                                                                                                                                                                                                |     |
|----|--------------------------------------------------------------------------------------------------------------------------------------------------------------------------------------------------------------------------------------------------------------------------------|-----|
| 62 | Entbindung einer Gemeindereferentin vom Amt einer ehrenamtlichen Verwaltungsrichterin. OVG Nordrhein-Westfalen, Beschluss vom 6.12.2001 (16 F 56/01).....                                                                                                                      | 405 |
| 63 | Kostenerstattungsanspruch eines Mitglieds der Mitarbeitervertretung. LAG Rheinland-Pfalz, Urteil vom 6.12.2001 (4 Sa 1070/01).....                                                                                                                                             | 408 |
| 64 | Gemeinnützigkeitsschädliche Verwendung von Mitteln für den wirtschaftlichen Geschäftsbetrieb eines Freizeitheims. FG Münster, Urteil vom 10.12.2001 (9 K 2537/98 K).....                                                                                                       | 412 |
| 65 | Vergleichsvorschlag zur Beilegung der Verfassungsstreitverfahren um die Stellung des Religionsunterrichts und die Einführung des Schulfachs LER in Brandenburg. BVerfG, Beschluss vom 11.12.2001 (1 BvF 1/96, 1 BvR 1697/96, 1 BvR 1718/96, 1 BvR 1783/96, 1 BvR 1412/97)..... | 417 |
| 66 | Innerbehördliche Organisationsmaßnahme, Rechtsschutz. VG Hamburg, Urteil vom 12.12.2001 (7 VG 4025/2000).....                                                                                                                                                                  | 420 |
| 67 | Staatl. Anerkennung einer Religionsgemeinschaft. EGMR, Urteil vom 13.12.2001 (Appl.No. 45701/99 [Metropolitan Church of Bessarabia ./ Moldavia]) .....                                                                                                                         | 427 |
| 68 | Nachrichtendienstliche Beobachtung von Scientology durch Vertrauensleute. VG Berlin, Urteil vom 13.12.2001 (27 A 260/98).....                                                                                                                                                  | 451 |
| 69 | Festsetzung / Erhebung der Kircheneinkommensteuer in Bayern. FG München, Gerichtsbescheid vom 14.12.2001 (13 K 2420/01) .....                                                                                                                                                  | 465 |
| 70 | Änderung einer fehlerhaften Anrechnung von Kirchenlohnsteuer. FG München, Urteil vom 17.12.2001 (13 K 1533/01) .....                                                                                                                                                           | 466 |
| 71 | Nachträgliche Einführung einer Friedhofsunterhaltungsgebühr. BVerwG, Beschluss vom 18.12.2001 (9 BN 5/01) .....                                                                                                                                                                | 469 |
| 72 | Herausnahme eines leitenden Mitarbeiters aus dem Geltungsbereich der MAVO. LAG Niedersachsen, Urteil vom 18.12.2001 (12 Sa 694/01)...                                                                                                                                          | 472 |
| 73 | Wandkreuz in Volksschulen u. Religionsfreiheit des Lehrers. BayVGH, Urteil vom 21.12.2001 (3 B 98.563).....                                                                                                                                                                    | 476 |
